# Supplementary material
Source: ML conference proceedings conference paper supplement (https://proceedings.neurips.cc/paper_files/paper/2016/hash/be3159ad04564bfb90db9e32851ebf9c-Abstract.html)
Supplement: Supplementary file [file be3159ad04564bfb90db9e32851ebf9c-Supplemental.zip]

## A Proofs

In this appendix, we prove Theorem 1 in Section 2, and Lemma 8, Theorem 2, and Corollary 5 in Section 3. The proofs of Theorems 3 and 4 are omitted, since they are essentially similar to that of Theorem 2 relying on slightly different uniform deviation bounds.

### A.1 Proof of Theorem 1

The proof is straightforward. Denote by

$$\pi_+(x) = p(Y = +1 \mid X = x), \quad \pi_-(x) = p(Y = -1 \mid X = x),$$

then the *conditional risk* is

$$\begin{aligned} \mathbb{E}_Y[\ell_{\text{sr}}(g(X), Y) \mid X = x] &= \pi_+(x)\ell_{\text{sr}}(g(x), +1) + \pi_-(x)\ell_{\text{sr}}(g(x), -1) \\ &= \begin{cases} \pi_+(x), & g(x) \leq -1, \\ 1/2 - (\pi_+(x) - \pi_-(x))g(x)/2, & -1 < g(x) < +1, \\ \pi_-(x), & g(x) \geq +1. \end{cases} \end{aligned}$$

The minimum is achieved by  $g(x) = \text{sign}(\pi_+(x) - \pi_-(x))$ , which is actually the Bayes classifier. Therefore,  $\ell_{\text{sr}}$  is classification-calibrated according to Theorem 1.3.c in [19].  $\square$

### A.2 Proof of Lemma 8

Similarly to the decomposition in Eq. (3) such that

$$R(g) = 2\pi R_+(g) + R_{\text{u},-}(g) - \pi,$$

we have seen in the definition of  $\hat{R}_{\text{pu}}(g)$  that it can also be decomposed into

$$\hat{R}_{\text{pu}}(g) = 2\pi \hat{R}_+(g) + \hat{R}_{\text{u},-}(g) - \pi,$$

where

$$\hat{R}_+(g) = \frac{1}{n_+} \sum_{x_i \in \mathcal{X}_+} \ell(g(x_i), +1), \quad \hat{R}_{\text{u},-}(g) = \frac{1}{n_{\text{u}}} \sum_{x_j \in \mathcal{X}_{\text{u}}} \ell(g(x_j), -1)$$

are the empirical averages corresponding to  $R_+(g)$  and  $R_{\text{u},-}(g)$ . Due to the sub-additivity of the supremum operators, it holds that

$$\sup_{g \in \mathcal{G}} |\hat{R}_{\text{pu}}(g) - R(g)| \leq 2\pi \sup_{g \in \mathcal{G}} |\hat{R}_+(g) - R_+(g)| + \sup_{g \in \mathcal{G}} |\hat{R}_{\text{u},-}(g) - R_{\text{u},-}(g)|.$$

As a result, in order to prove Lemma 8, it suffices to show that with probability at least  $1 - \delta/2$ , the uniform deviation bounds below hold separately:

$$\sup_{g \in \mathcal{G}} |\hat{R}_+(g) - R_+(g)| \leq 2L_\ell \mathfrak{R}_{n_+, p_+}(\mathcal{G}) + \sqrt{\frac{\ln(4/\delta)}{2n_+}}, \quad (16)$$

$$\sup_{g \in \mathcal{G}} |\hat{R}_{\text{u},-}(g) - R_{\text{u},-}(g)| \leq 2L_\ell \mathfrak{R}_{n_{\text{u}}, p}(\mathcal{G}) + \sqrt{\frac{\ln(4/\delta)}{2n_{\text{u}}}}. \quad (17)$$

In the following we prove (16), and then (17) can be proven using the same proof technique.

Since the surrogate loss  $\ell$  is bounded by 0 and 1 according to (2), the change of  $\hat{R}_+(g)$  will be no more than  $1/n_+$  if some  $x_i$  in  $\mathcal{X}_+$  is replaced with  $x'_i$ . Thus *McDiarmid's inequality* [31] implies

$$\Pr \left[ |\hat{R}_+(g) - R_+(g)| \geq \epsilon \right] \leq 2 \exp \left( -\frac{2\epsilon^2}{n_+(1/n_+)^2} \right)$$

for any fixed  $g$ . Equivalently, for any fixed  $g$ , with probability at least  $1 - \delta/2$ ,

$$|\hat{R}_+(g) - R_+(g)| \leq \sqrt{\frac{\ln(4/\delta)}{2n_+}}.$$

Then, according to the *basic uniform deviation bound* using the Rademacher complexity [18], with probability at least  $1 - \delta/2$ ,

$$\sup_{g \in \mathcal{G}} |\hat{R}_+(g) - R_+(g)| \leq 2\mathfrak{R}_{n_+, p_+}(\ell \circ \mathcal{G}) + \sqrt{\frac{\ln(4/\delta)}{2n_+}}, \quad (18)$$

where  $\mathfrak{R}_{n_+, p_+}(\ell \circ \mathcal{G})$  is the Rademacher complexity of the *composite function class*  $(\ell \circ \mathcal{G})$  for the sampling of size  $n_+$  from  $p_+(x)$  defined by

$$\mathfrak{R}_{n_+, p_+}(\ell \circ \mathcal{G}) = \mathbb{E}_{\mathcal{X}_+ \sim p_+} \mathbb{E}_\sigma \left[ \sup_{g \in \mathcal{G}} \frac{1}{n_+} \sum_{x_i \in \mathcal{X}_+} \sigma_i \ell(g(x_i), +1) \right].$$

As  $\ell(t, y)$  is  $L_\ell$ -Lipschitz-continuous in  $t$  for every  $y$ , we have  $\mathfrak{R}_{n_+, p_+}(\ell \circ \mathcal{G}) \leq L_\ell \mathfrak{R}_{n_+, p_+}(\mathcal{G})$  by *Talagrand's contraction lemma* [32], which proves (16).  $\square$

### A.3 Proof of Theorem 2

Based on Lemma 8, the estimation error bound (7) is proven through

$$\begin{aligned} R(\hat{g}_{\text{pu}}) - R(g^*) &= \left( \hat{R}_{\text{pu}}(\hat{g}_{\text{pu}}) - \hat{R}_{\text{pu}}(g^*) \right) + \left( R(\hat{g}_{\text{pu}}) - \hat{R}_{\text{pu}}(\hat{g}_{\text{pu}}) \right) + \left( \hat{R}_{\text{pu}}(g^*) - R(g^*) \right) \\ &\leq 0 + 2 \sup_{g \in \mathcal{G}} |\hat{R}_{\text{pu}}(g) - R(g)| \\ &\leq 8\pi L_\ell \mathfrak{R}_{n_+, p_+}(\mathcal{G}) + 4L_\ell \mathfrak{R}_{n_u, p}(\mathcal{G}) + 2\pi \sqrt{\frac{2 \ln(4/\delta)}{n_+}} + \sqrt{\frac{2 \ln(4/\delta)}{n_u}}, \end{aligned}$$

where we have used  $\hat{R}_{\text{pu}}(\hat{g}_{\text{pu}}) \leq \hat{R}_{\text{pu}}(g^*)$  by the definition of  $\hat{g}_{\text{pu}}$ .

Moreover, if  $\ell$  is classification-calibrated, Theorem 1 in [19] implies that there will exist a convex, invertible and nondecreasing transformation  $\psi_\ell$  with  $\psi_\ell(0) = 0$ , such that

$$\psi_\ell(I(\hat{g}_{\text{pu}}) - I^*) \leq R(\hat{g}_{\text{pu}}) - R^*.$$

Hence, let  $\varphi = \psi_\ell^{-1}$ , we have

$$\begin{aligned} I(\hat{g}_{\text{pu}}) - I^* &\leq \varphi(R(\hat{g}_{\text{pu}}) - R^*) \\ &= \varphi(R(g^*) - R^* + R(\hat{g}_{\text{pu}}) - R(g^*)), \end{aligned}$$

and subsequently the excess risk bound (8) is an immediate corollary of (7).  $\square$

### A.4 Proof of Corollary 5

Given (5), the estimation error bound (7) can be rewritten into

$$\begin{aligned} R(\hat{g}_{\text{pu}}) - R(g^*) &\leq 8\pi L_\ell C_{\mathcal{G}} / \sqrt{n_+} + 2\pi \sqrt{\frac{2 \ln(4/\delta)}{n_+}} + 4L_\ell C_{\mathcal{G}} / \sqrt{n_u} + \sqrt{\frac{2 \ln(4/\delta)}{n_u}} \\ &= 2\pi f(\delta) / \sqrt{n_+} + f(\delta) / \sqrt{n_u}, \end{aligned}$$

where  $f(\delta) = 4L_\ell C_{\mathcal{G}} + \sqrt{2 \ln(4/\delta)}$ . This proves (12). In exactly the same way, we could get (11) from (9) and (13) from (10).

Consider the special case of  $\mathcal{G}$  defined in (6). Recall that  $\mathfrak{R}_{n,q}(\mathcal{G})$  is the Rademacher complexity of  $\mathcal{G}$  for  $\mathcal{X} = \{x_1, \dots, x_n\}$  with each  $x_i$  drawn from  $q(x)$ . Given any such  $\mathcal{X}$ , denote by  $\hat{\mathfrak{R}}_{\mathcal{X}}(\mathcal{G})$  the empirical Rademacher complexity of  $\mathcal{G}$  conditioned on  $\mathcal{X}$  [18]:

$$\hat{\mathfrak{R}}_{\mathcal{X}}(\mathcal{G}) = \mathbb{E}_\sigma \left[ \sup_{g \in \mathcal{G}} \frac{1}{n} \sum_{x_i \in \mathcal{X}} \sigma_i g(x_i) \right].$$

It is known that  $\hat{\mathfrak{R}}_{\mathcal{X}}(\mathcal{G}) \leq C_w C_\phi / \sqrt{n}$  and thus  $\mathfrak{R}_{n,q}(\mathcal{G}) = \mathbb{E}_{\mathcal{X}}[\hat{\mathfrak{R}}_{\mathcal{X}}(\mathcal{G})] \leq C_w C_\phi / \sqrt{n}$  [18]. Then, letting  $C_{\mathcal{G}} = C_w C_\phi$  completes the proof.  $\square$
